# Supplementary material
Source: ML conference proceedings conference paper supplement (https://proceedings.mlr.press/v164/yang22b.html)
Supplement: Supplementary file 1 [file yang22b-supp.zip]

# Supplementary Material

---

ANYTIME DEPTH ESTIMATION WITH LIMITED SENSING AND  
COMPUTATION CAPABILITIES ON MOBILE DEVICES

# S.1

## Visualized Prediction Examples

---

Extending  
**Figure 4** with  
additional  
examples

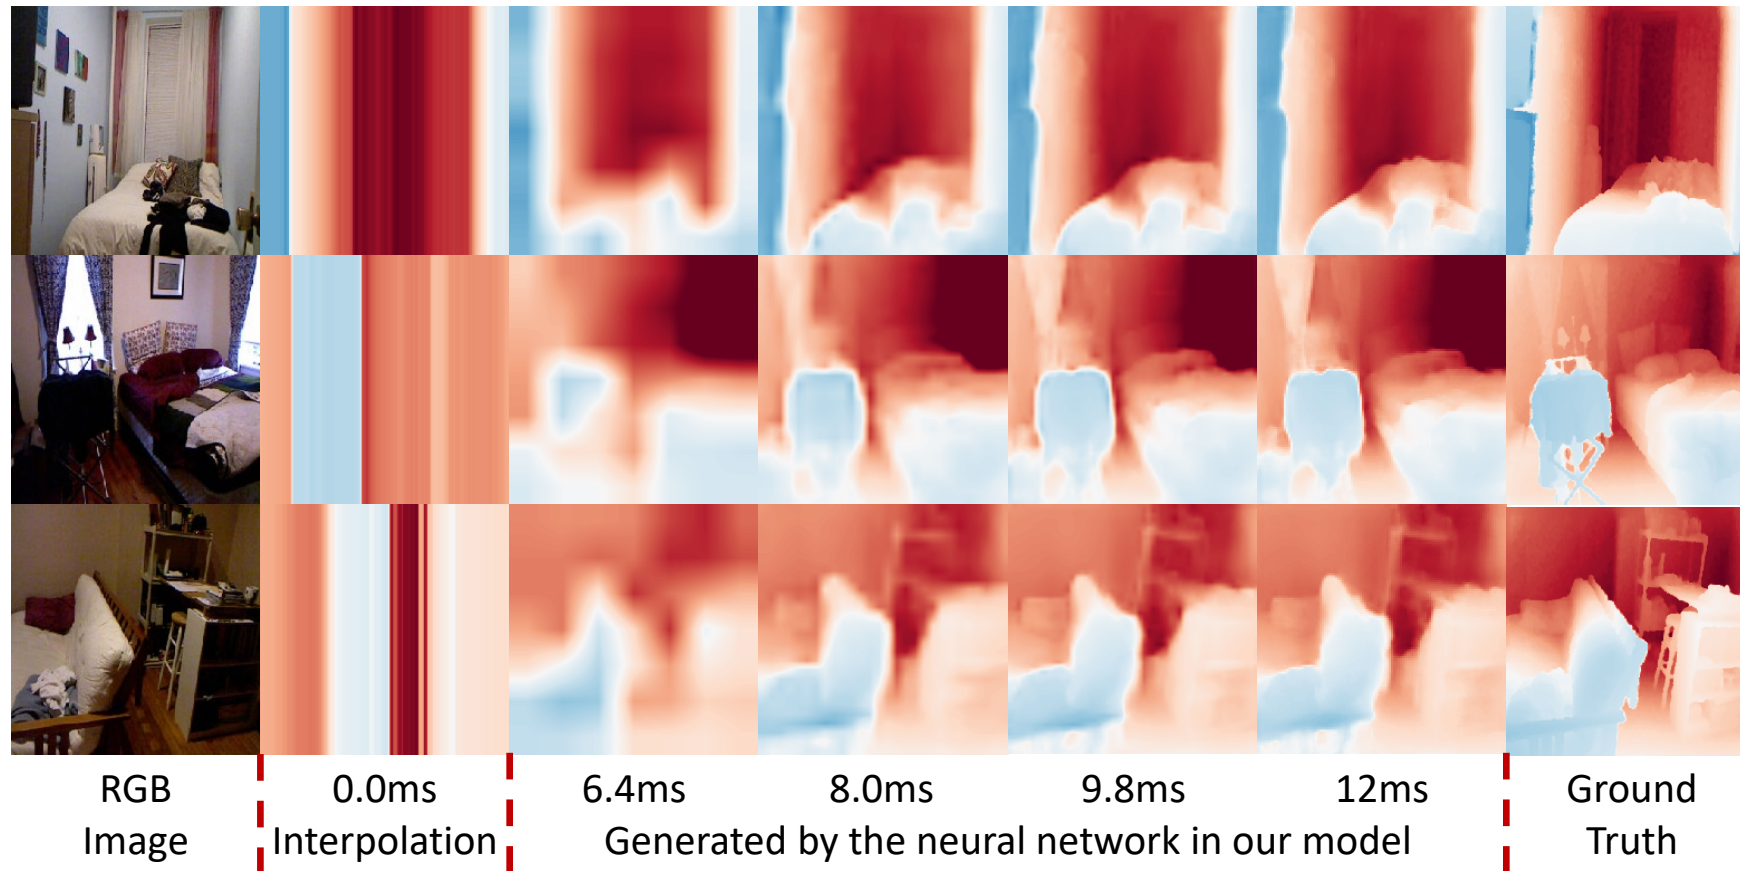

# S.1 (cont'd)

## Visualized Prediction Examples

---

Extending  
**Figure 4** with  
additional  
examples

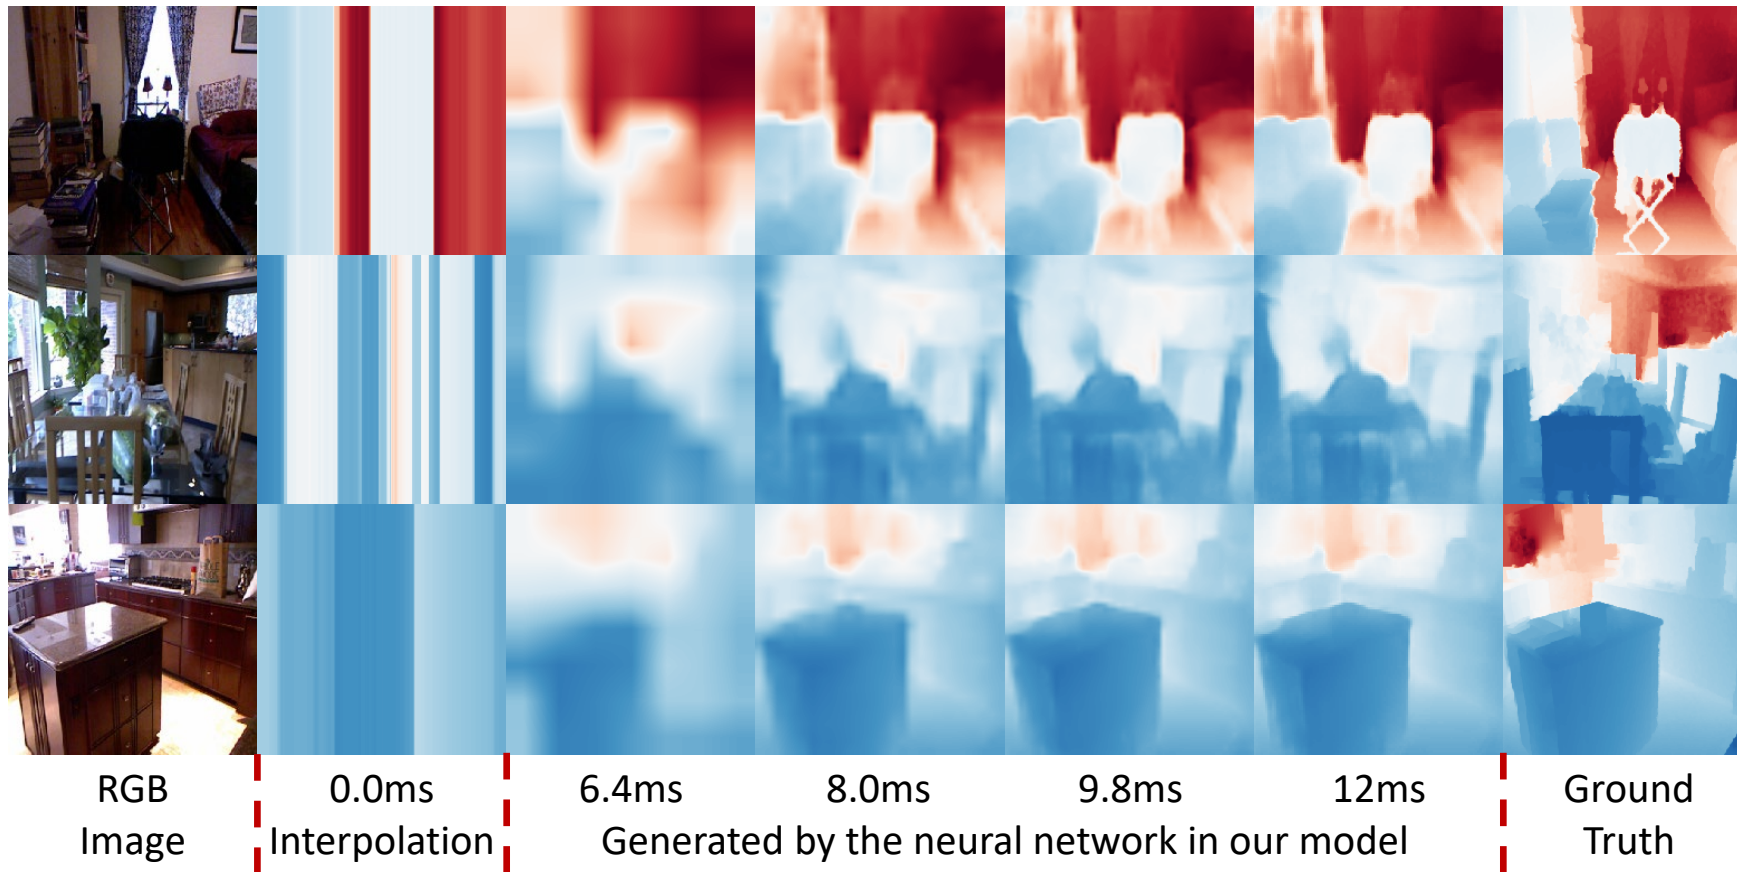

# S.1 (cont'd)

## Visualized Prediction Examples

Extending  
**Figure 4** with  
additional  
examples

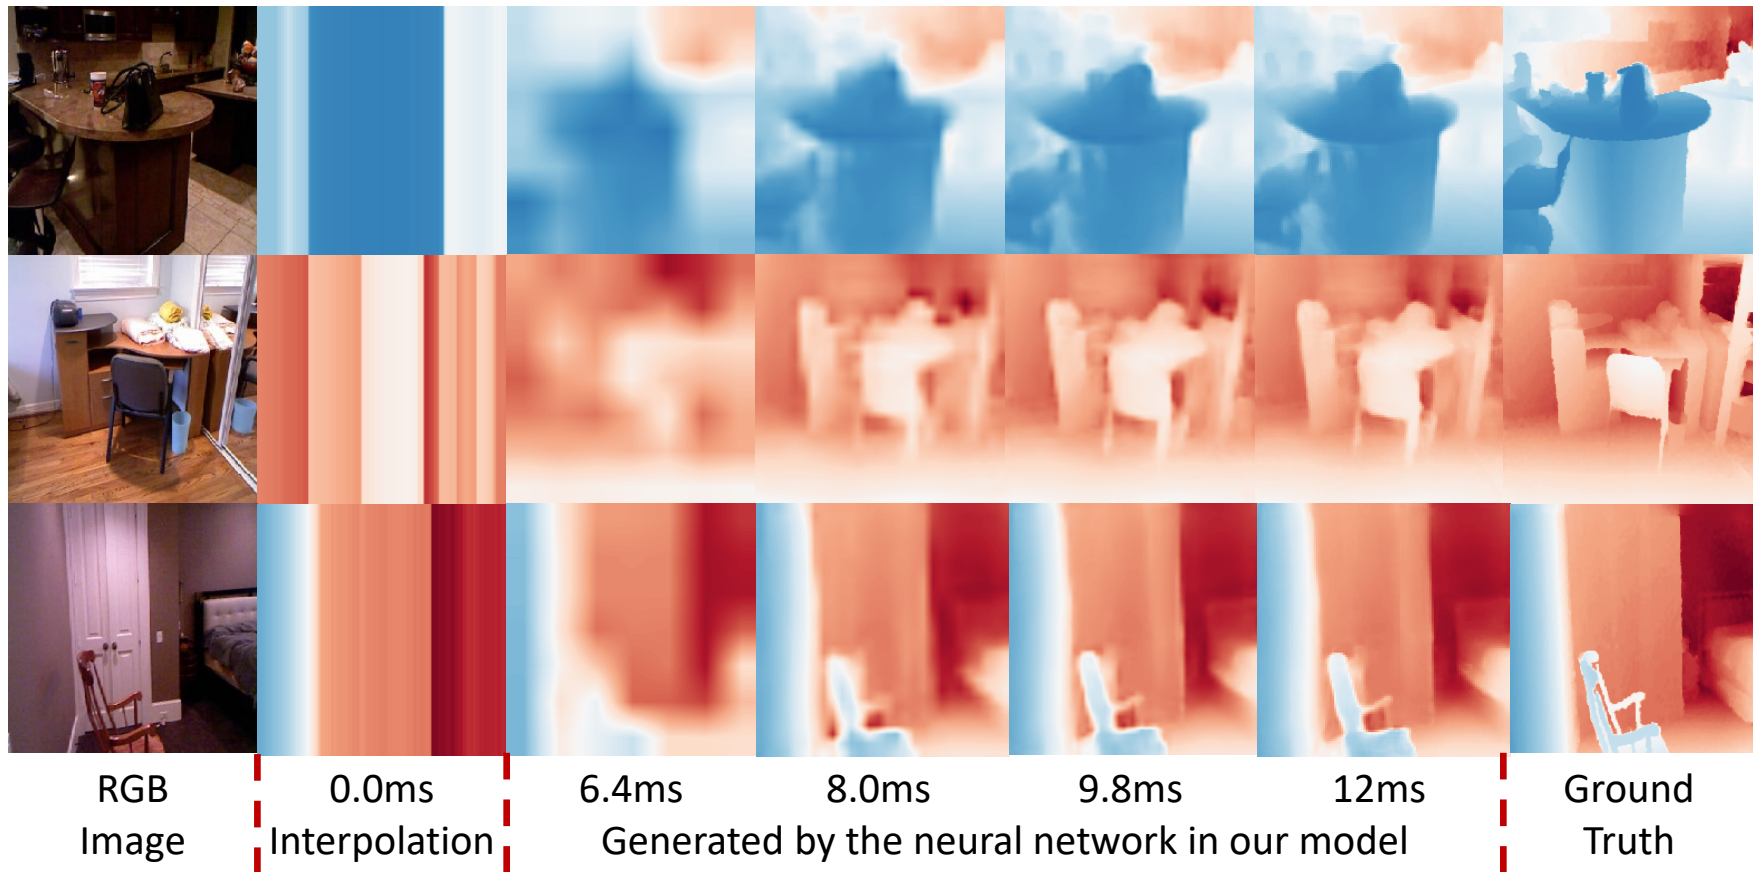

## S.2 Complete Evaluation Results for KITTI Odometry Dataset [Table 3]

Path 2 – Path 4 show similar accuracy scores. Considering that most of prior methods use a smaller model on KITTI dataset, e.g., S2D use ResNet-18 based model for KITTI dataset while use ResNet-50 based model for NYU Depth V2, one possible reason is that our model for Path 2 is large enough for the KITTI Odometry Dataset and model for Path 4 is too large for it.

|                 |  | Method          | Input size | Latency↓ | RMSE↓ | Rel↓  | $\delta_1 \uparrow$ | Param/M | Flops/G |
|-----------------|--|-----------------|------------|----------|-------|-------|---------------------|---------|---------|
| Supervised      |  | S2D [1]         | 228×912    | 374.7ms  | 4.272 | 10.0% | 0.902               | 11.49   | 8.593   |
|                 |  | EncDecNet [8]   | 228×912    | NA       | 5.462 | 11.6% | 0.839               | 0.484   | 4.000   |
|                 |  | CSPN [5]        | 228×912    | NA       | 3.661 | 6.81% | 0.735               | 218.1   | 261.7   |
|                 |  | PENet [14]      | 352×1216   | NA       | 2.694 | 11.4% | 0.942               | 131.9   | 405.3   |
|                 |  | Ours Path0      | 224×896    | 0.00ms   | 11.64 | 41.1% | 0.399               | 0.000   | 0.000   |
|                 |  | Ours Path1      | 224×896    | 18.29ms  | 4.470 | 9.76% | 0.883               | 1.489   | 1.302   |
|                 |  | Ours Path2      | 224×896    | 25.11ms  | 4.169 | 8.56% | 0.903               | 1.983   | 1.711   |
|                 |  | Ours Path3      | 224×896    | 30.63ms  | 4.159 | 8.36% | 0.905               | 2.006   | 2.024   |
|                 |  | Ours Path4      | 224×896    | 40.45ms  | 4.183 | 8.06% | 0.905               | 2.014   | 2.375   |
|                 |  | MonoDepth2 [19] | 192×640    | 77.26ms  | 3.259 | 8.16% | 0.926               | 15.24   | 8.051   |
| Self Supervised |  | Ours Path4      | 192×640    | 25.85ms  | 3.608 | 8.13% | 0.943               | 2.014   | 1.518   |

Table shows that our approach uses a model which is precise, yet small and low-power enough to run on real-time embedded devices.

Extending Table 3 with additional results (Highlighted)



# S.3

## Quantitative Results for Figure 5

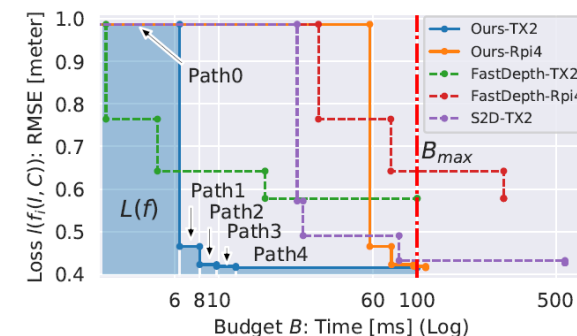

| Input Size       | RMSE   | TX2 Latency | TX2 Energy |
|------------------|--------|-------------|------------|
| $28 \times 38$   | 0.5941 | 24.87ms     | 0.269J     |
| $56 \times 76$   | 0.5004 | 26.65ms     | 0.302J     |
| $112 \times 152$ | 0.4320 | 81.12ms     | 0.954J     |
| $228 \times 304$ | 0.4265 | 554.95ms    | 6.244J     |

S2D

“RPI4” stands for Raspberry Pi4.

Considering that S2D is too slow and energy-consuming even on TX2 system, we didn’t deploy it on Raspberry Pi4.

Extending  
Figure 5

| Input Size       | RMSE   | TX2 Latency | TX2 Energy | RPi4 Latency | RPi4 Energy |
|------------------|--------|-------------|------------|--------------|-------------|
| $56 \times 56$   | 0.7643 | 2.71ms      | 0.171J     | 31.81ms      | 0.052J      |
| $112 \times 112$ | 0.6422 | 4.92ms      | 0.220J     | 73.63ms      | 0.247J      |
| $224 \times 224$ | 0.5780 | 17.14ms     | 0.236J     | 272.65ms     | 1.09J       |

FastDepth

New results, not  
shown in Paper.

| Output Path | Input Size       | RMSE   | TX2 Latency | TX2 Energy | RPi4 Latency | RPi4 Energy |
|-------------|------------------|--------|-------------|------------|--------------|-------------|
| Path 1      | $224 \times 224$ | 0.4651 | 6.37ms      | 0.207J     | 57.72ms      | 0.137J      |
| Path 2      | $224 \times 224$ | 0.4225 | 8.03ms      | 0.213J     | 74.23ms      | 0.222J      |
| Path 3      | $224 \times 224$ | 0.4184 | 9.77ms      | 0.263J     | 96.04ms      | 0.323J      |
| Path 4      | $224 \times 224$ | 0.4156 | 12.21ms     | 0.313J     | 110.42ms     | 0.402J      |

Ours

## S.4

# Error Distribution of Depth Map

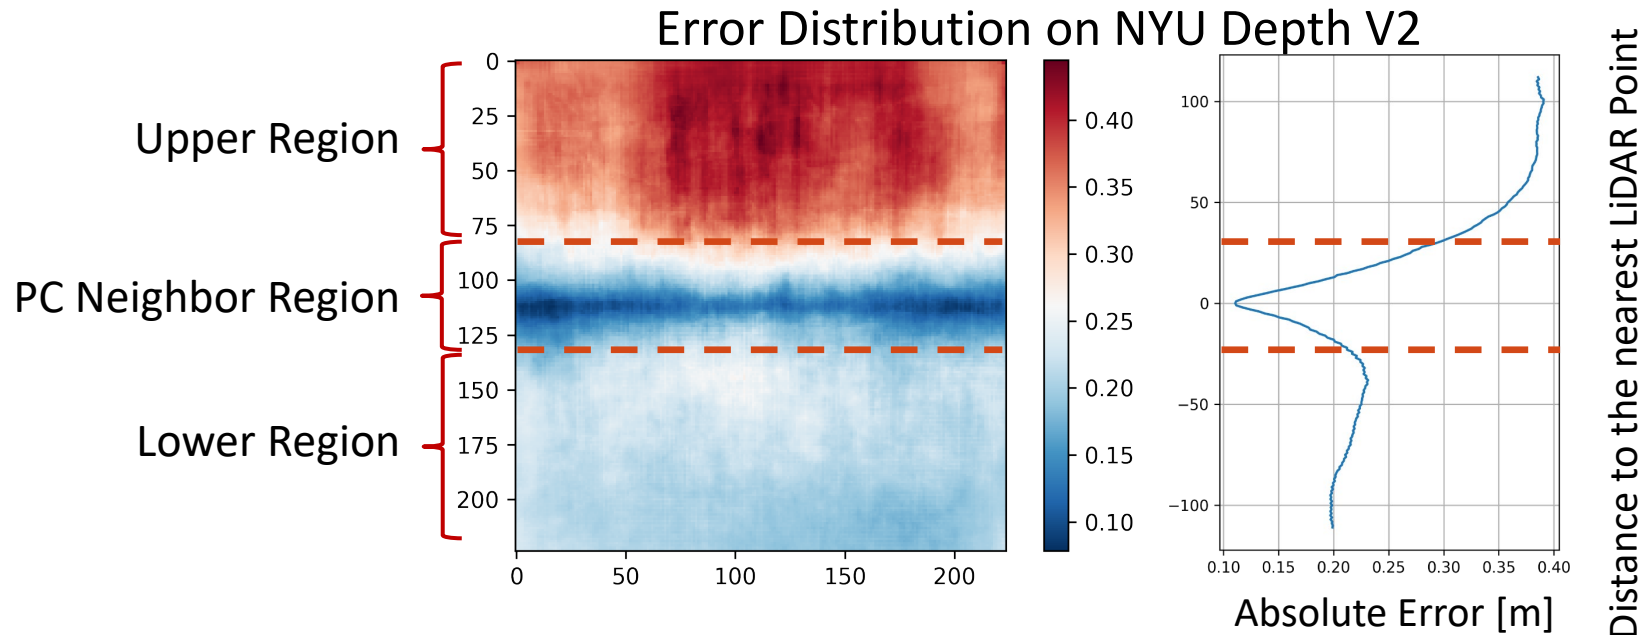

Extending  
Section 5 with  
additional  
experiments  
not shown  
in Paper

Generally the error map is partitioned into upper, lower and PC neighbor region. Pixels in the PC neighbor region is close to LiDAR points, so that they have the smallest error, which means that our ECU module effectively aligns image features to PC feature. In NYU Depth V2 dataset, lower region mostly covers the ground, which is close to the camera, so the error is smaller comparing with the upper region.

# S.5

## Power Consumption of 2D and 3D LiDAR

---

Here we list the power consumption of some commercial 2D and 3D LiDARs.

### 2D LIDAR

[RPLiDAR A2](#): 2.25W-3W

[RPLiDAR A1](#): 0.5W

[YDLiDAR X2](#): 2W

[YDLiDAR G6](#): 2W-2.4W

[CA113](#): 2W

### 3D LIDAR

[HDL 64E](#): 60W (Used by the Kitti dataset)

[HDL 32E](#): 12W

[OS1-32](#): 14-20W

[Puck](#): 8W

Clarification for **Section 1** (Introduction)  
Concrete power values for commercial  
2D and 3D LiDAR (all links are clickable)



## S.6

# Accuracy under Different Camera-LiDAR Positions

Upper Region  
Tables, Etc.  
More Objects

Lower Region  
Ground  
Fewer Objects

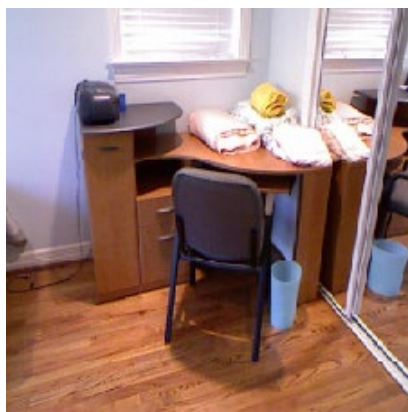

Typical Scene

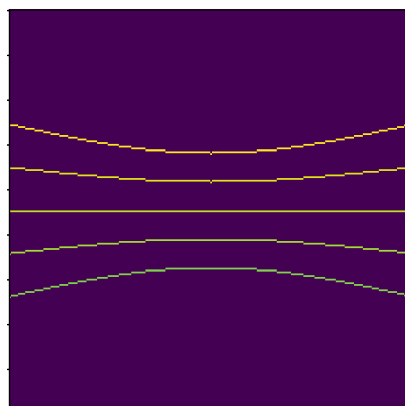

Projected Positions of  
2D Point Cloud

Offset

-48  
-24  
0  
24  
48

| Offset | Path 1 | Path 2 | Path 3 | Path 4        |
|--------|--------|--------|--------|---------------|
| -48    | 0.4174 | 0.3702 | 0.3650 | <b>0.3655</b> |
| -24    | 0.4415 | 0.3968 | 0.3919 | 0.3900        |
| 0      | 0.4651 | 0.4225 | 0.4184 | <b>0.4156</b> |
| 24     | 0.4846 | 0.4462 | 0.4436 | 0.4420        |
| 48     | 0.5113 | 0.4758 | 0.4728 | 0.4713        |

RMSE under Different Camera-LiDAR Positions

We evaluate our model under different camera-LiDAR positions. Results with 0 offset are reported in paper. As the projected position of PC moves upward, the accuracy improves significantly. This is because the lower region typically corresponds to the ground, while the upper region corresponds to the objects in the scene, e.g., tables, walls, etc. Thus, the PC in the upper region may bring more information about the environment to the model, which translates into a better prediction accuracy.

Additional  
Experiments  
(not shown  
in Paper)

# S.7

## Clarifications about the “Budget” Concept

---

### Available Budget vs Required Budget

- All budget references in the main text refer to the *available* budget, e.g., how much computation can we afford for inference. This is determined by the environment and not controllable by the model. We model this budget as a random variable.
- A similar concept is the *required* budget, e.g., how much computation do we actually need for inference. This can be tuned by designing a more efficient model.

### The Minimum Possible Budget – Zero

- Zero available computation budget is possible because the preprocessing steps (like image resizing, point cloud transforming) are not included in the model; these preprocessing steps may use up all the computation budget when the system gets busy.
- This is why we need to consider the  $[0, B_{max}]$  interval with the minimum possible budget zero.

## S.7 (cont'd)

# Clarifications about the “Budget” Concept

---

### Fixed Budget vs Random Budget

- Take the time budget as an example. One may think that as long as the required run time of the model is smaller than a fixed time budget, the model is good to be deployed on device. However, this is not true. For example, in the video experiment we provide in supplementary material, though the vanilla model requires only 12ms for inference, it fails to make any prediction in 40ms.
- This is because when one talks about the “fixed time budget”, one may refer to the “fixed wall-clock time” instead of the “real run time”; one of our main motivations for introducing the random budget and random halting is precisely to simulate the gap between the wall clock time and the real run time. The difference between wall clock time and actual run time can be huge.
- In general, one may never know for how much time the OS pauses the model inference to execute other tasks, or for how long the memory accesses stall, or how long the inter-core communication may take. As the system gets busy, a large portion of the time is spent on other things instead of running the inference; this is especially true for embedded systems that have very limited computation capabilities.

Thank you!

---
